# Supplementary material for: Single-Cell Analysis Reveals Partial Reactivation of X Chromosome instead of Chromosome-wide Dampening in Naive Human Pluripotent Stem Cells
Source: PubMed Central journal article supplement — Stem Cell Reports. 2020 Apr 30;14(5):745–54. doi: 10.1016/j.stemcr.2020.03.027 (PMC7221091; doi:10.1016/j.stemcr.2020.03.027), 2020-04-30
Supplement: mmc1.pdf [file mmc1.pdf]

**Stem Cell Reports, Volume 14**

**Supplemental Information**

**Single-Cell Analysis Reveals Partial Reactivation of X Chromosome instead of Chromosome-wide Dampening in Naive Human Pluripotent Stem Cells**

**Susmita Mandal, Deepshikha Chandel, Harman Kaur, Sudeshna Majumdar, Maniteja Arava, and Srimonta Gayen**

# **Single Cell Analysis Reveals Partial Reactivation of X-chromosome Instead of Chromosome-wide Dampening in Naïve Human Pluripotent Stem Cells**

Mandal S<sup>1</sup>, Chandel D<sup>1</sup>, Kaur H, Majumdar S, Arava M, and Gayen S\*

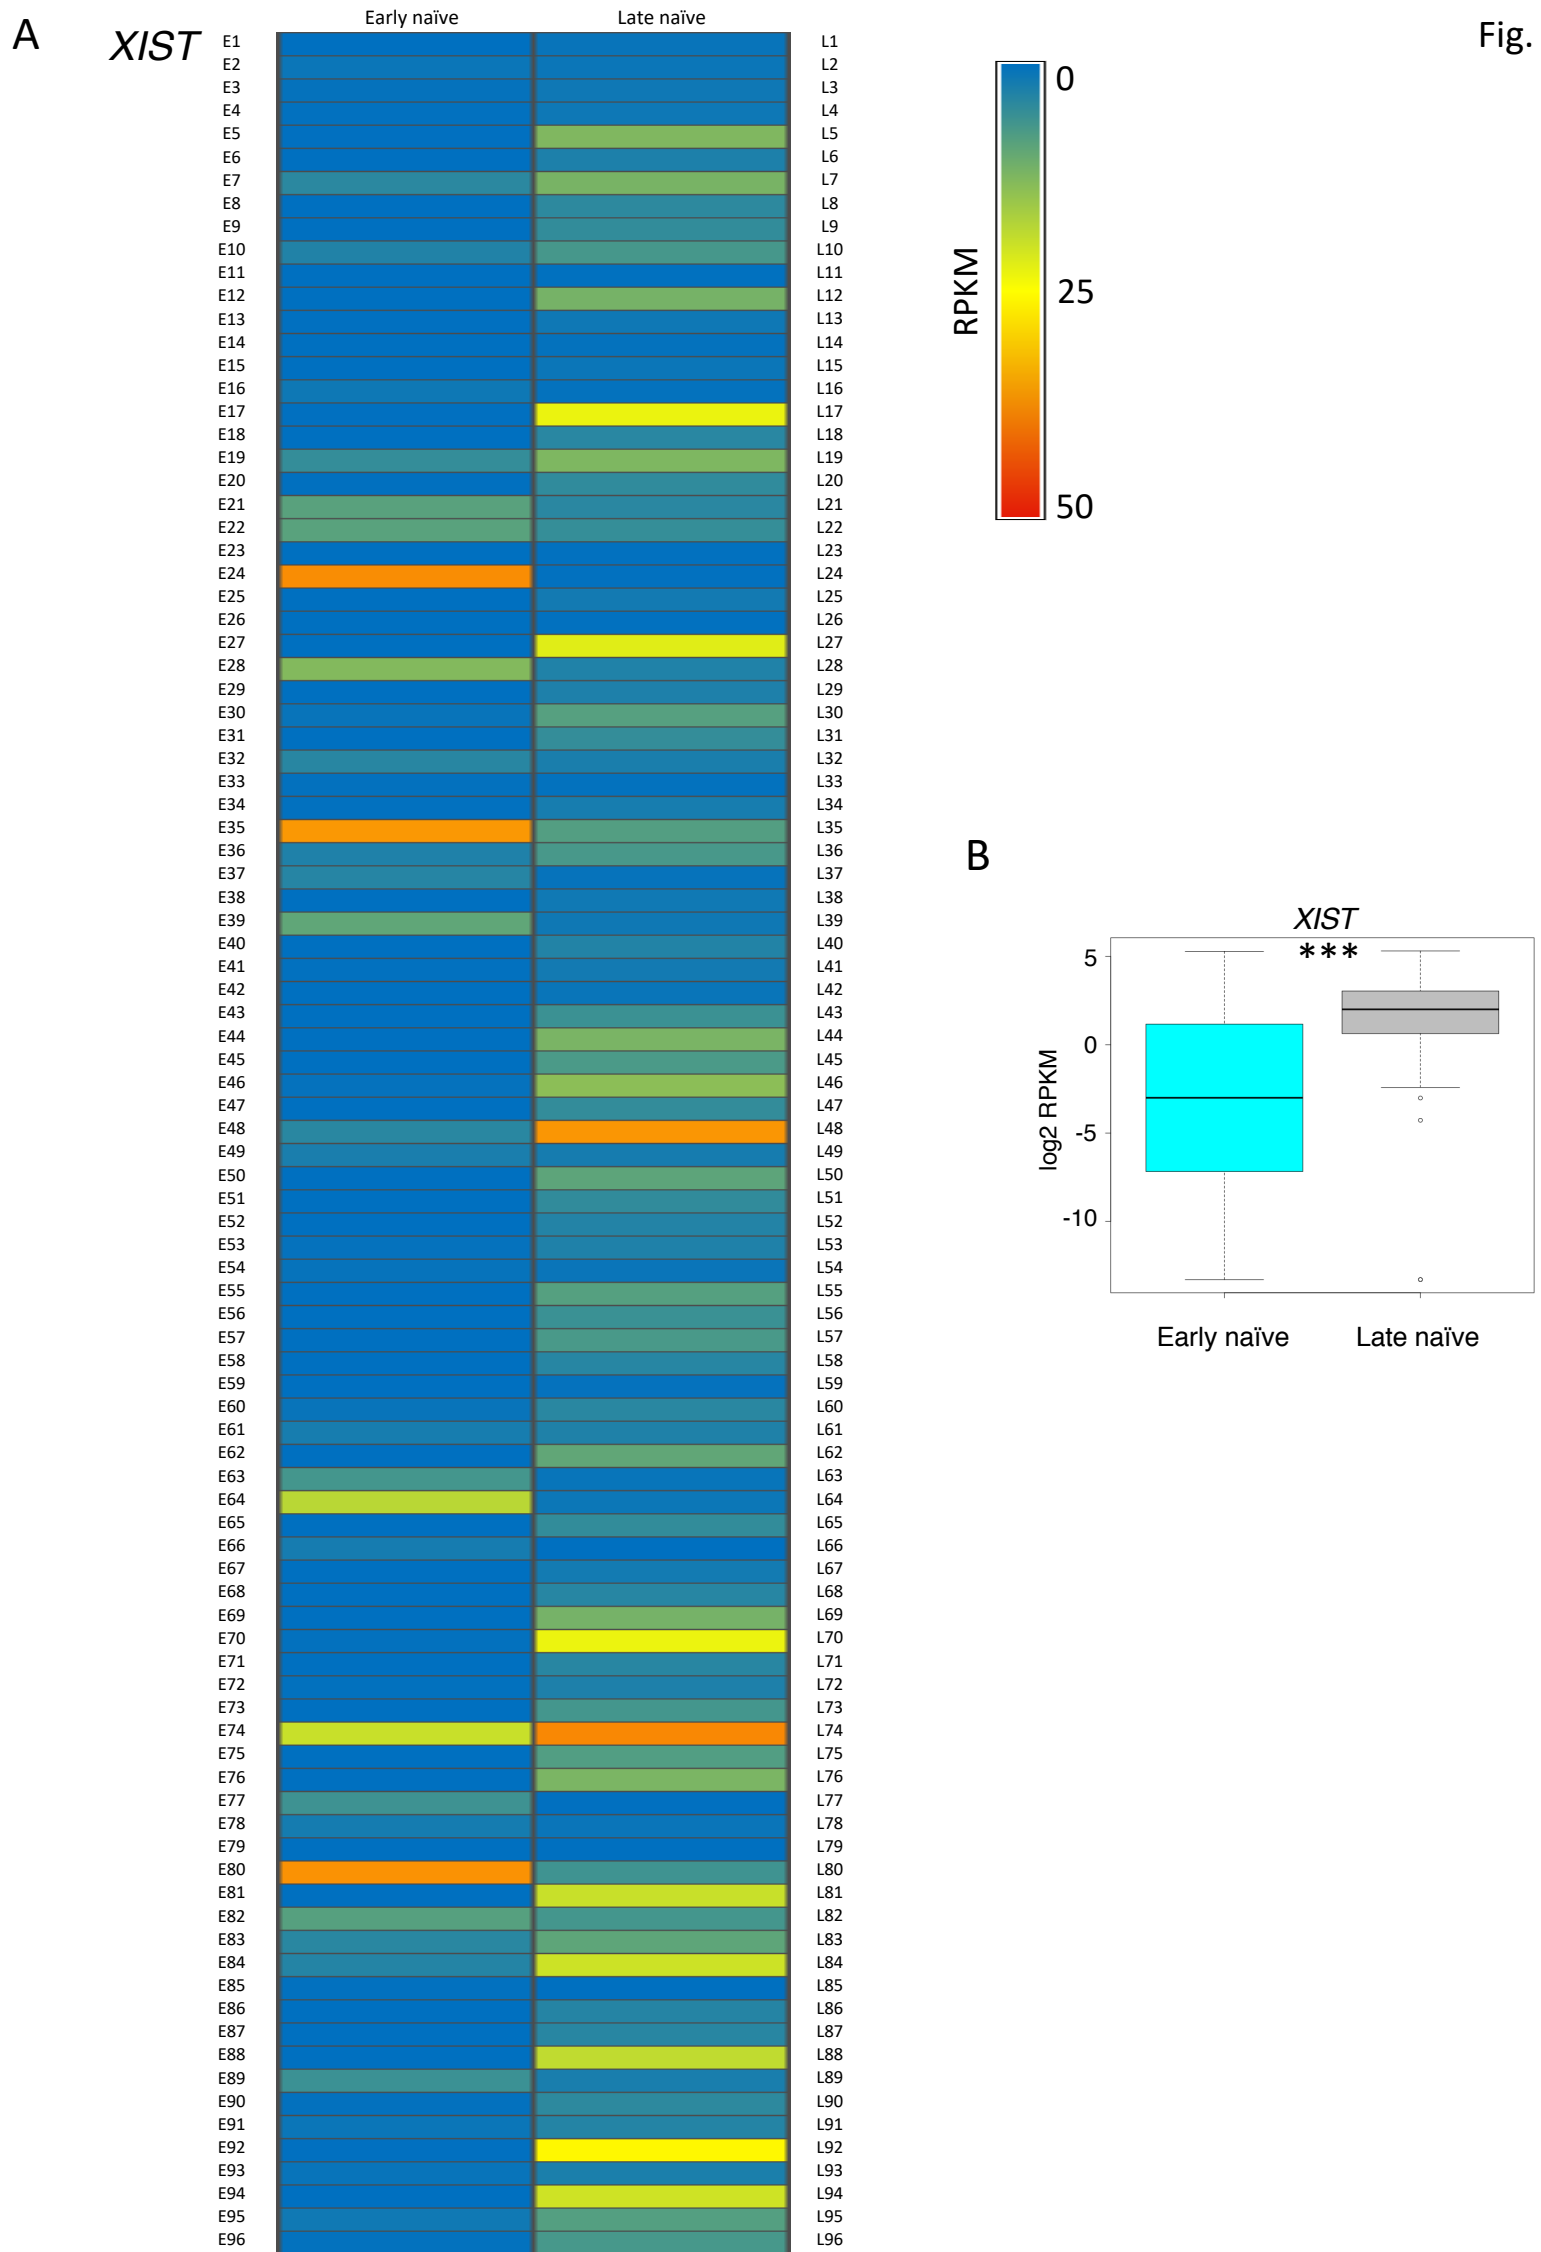

**Figure S1, related to figure 1:** Transition of early naïve to late naïve state is associated with increased *XIST* expression. (A) Heatmap representing the *XIST* expression (RPKM) in early naïve (n=96 cells) and late naïve cells (n=96 cells). (B) Comparison of *XIST* expression between early naïve (n=96 cells) and late naïve cells (n=96 cells).  $p < 0.00001$  (Mann-Whitney U-test).

**A**

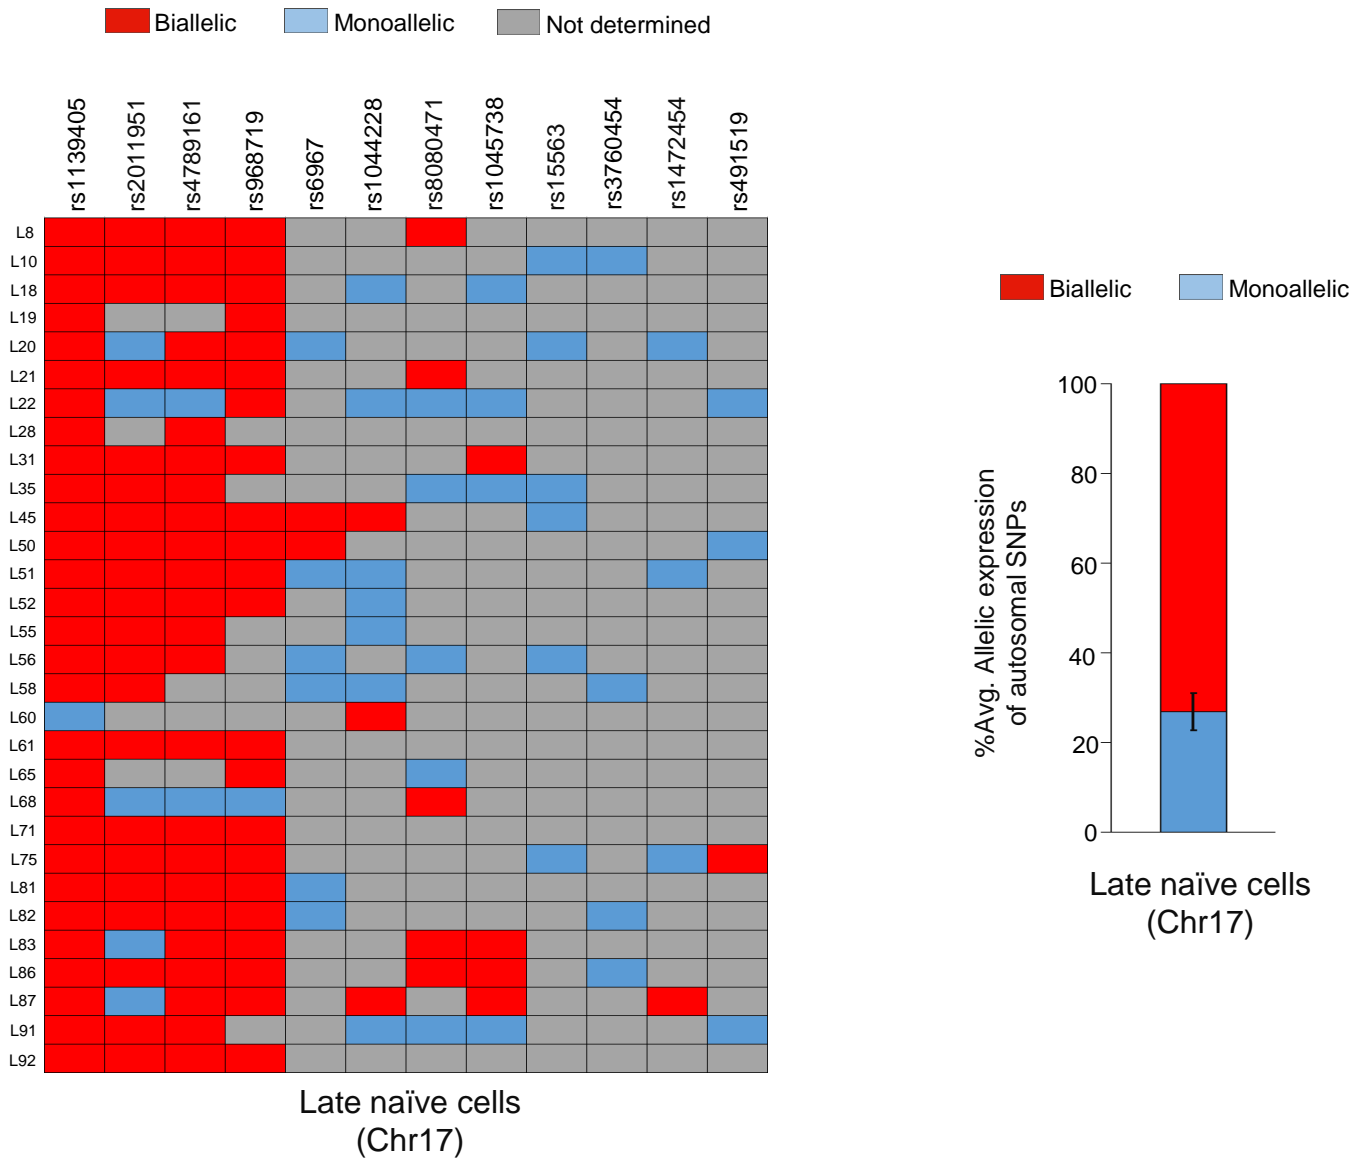

**B**

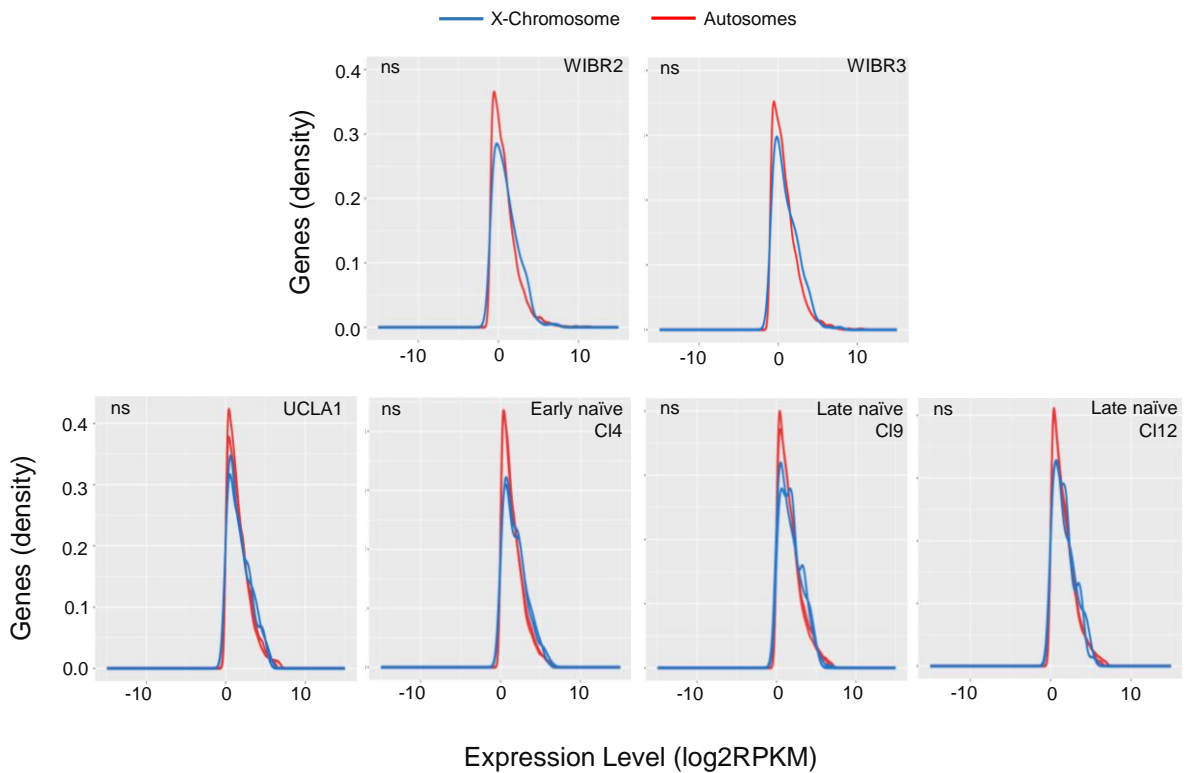

**Figure S2, related to figure 3 and figure 4:** (A) Allelic expression analysis of autosomal genes (Chr17) in late naïve cells (n=30 cells). Right, histogram showing the quantification of average percent of SNPs showing monoallelic and biallelic in late naïve cells. (B) Histograms showing that there were no significant difference between X-linked and autosomal gene expression distribution for WIBR2, WIBR3, UCLA1 primed, UCLA1 early naïve and UCLA1late naïve cells. ( $p > 0.05$ , by Kolmogorov-Smirnov test). Replicates of RNA-Seq dataset used: WIBR2 and WIBR3 (n=1); UCLA1, early naïve c14, late naïve c19, late naïve c112 (n=2).

## Supplementary file legends

**Table S1:** Analysis of X-linked gene expression in early and late naïve cells. Related to Figure 1

**Table S2:** Allelic analysis of *XIST* expression and comparison of X-linked gene expression in *XIST*-monoallelic, -biallelic and -negative cells of late naïve state. Related to Figure 2

**Table S3:** Allelic analysis of X-linked genes and autosomal genes (Chr17) in early and late naïve cells. Related to Figure 3

**Table S4:** Analysis of X-chromosomal ploidy in early and late naïve cells. Related to Figure 3

**Table S5:** RPKM of X-linked and autosomal genes used for X:A ratio analysis. Related to Figure 4

## 1 **Supplemental experimental procedures**

2 **Data acquisition:** For active X-chromosome upregulation analysis (related to Fig. 4), we used  
3 following datasets from bulk-population RNA-Seq: hESCs (H1) / 3iL hESCs (H1) -E-MTAB-  
4 2031(Chan et al., 2013), WIBR1, WIN1, WIBR2, WIBR3- GSE75868 (Theunissen et al.,  
5 2016), WIS2-GSE60138 (Irie et al., 2015), UCLA2- GSE88933 (Patel et al., 2017), H1\_A-  
6 GSE85331 (Liu et al., 2017), HUES8 - GSE102311(Sun et al., 2018), HNES1\_A, HNES1\_B  
7 - E-MTAB-5674 (Guo et al., 2017), HNES1\_C-E-MTAB-4461(Guo et al., 2016), 4iLIF H1,  
8 Lis1-GSE60955 (Sperber et al., 2015), H1\_B-GSE75748 (Chu et al., 2016). For hESCs (Sc) -  
9 GSE36552 (Yan et al., 2013), we used single cell RNA-Seq dataset of 8 single cells.

10 **Origin of naïve hPSCs:** WIN1: Embryo derived, cultured in either 5i/L/A or 4i/L/A medium  
11 (Theunissen et al., 2016); 3iL hESCs: converted from hESCs (H1) using 3iL media (Chan et  
12 al., 2013); HNES1\_A / B / C: Embryo derived, cultured in t2iLGO in different feeder  
13 conditions (Guo et al., 2016, 2017); 4iLIF H1: converted from H1 using 4iLIF media (Sperber  
14 et al., 2015); NHSM Lis1: Embryo derived, cultured in NHSM media (Sperber et al., 2015).

15 **Reads mapping and counting:** Reads were mapped to the human genome (hg38) using STAR  
16 (Dobin et al., 2013). Mapped reads were then processed using SAM tools (Li et al., 2009) and  
17 the number of reads mapping to each gene was counted using HTSeq-count (Anders et al.,  
18 2015).

19 **Expression analysis of *XIST* and X-linked genes in early vs late naïve cells:** We calculated  
20 RPKM (Reads Per Kilobase per Million) using rpkmforgenes (Ramsköld et al., 2009). First,  
21 we checked *XIST* expression in 192 single cells consisting of 96 early naïve and 96 late naïve  
22 cells. Then, for early naïve cells we selected 60 cells out of 96 showing very  
23 low *XIST* expression (0 to 0.5 RPKM) and then from these 60 cells we selected top 28 early  
24 cells having RPKM sum (2634.96 to 1267.39) and mean ( $> 0.9$ ) for further analysis. For late  
25 naïve cells, we selected 59 out of 96 showing very high *XIST* expression (3 to 39 RPKM) and  
26 then from these 59 cells we selected top 30 cells having RPKM sum (1949.62 to 1195.90) and  
27 mean ( $> 0.9$ ) for further analysis. To check the expression of X-linked genes in (28 early naïve  
28 + 30 late naïve cells), we considered only those genes which were having  $5 < \mu_{\text{RPKM}} < 200$ .

29 **Expression analysis of X-linked genes in *XIST*-biallelic, -monoallelic and -negative late  
30 naïve cells:** For this analysis, 59 cells were selected out of 96 late naïve cells based on the  
31 higher *XIST* expression (3 - 39 RPKM). Out of these 59 cells, 35 cells (RPKM sum  $> 500$ ;  
32 RPKM mean  $> 0.4$ ) had allelic data for *XIST*. Allelic expression analysis for *XIST* was



33 performed as described in allelic expression analysis method section. Out of these 35 cells, 26  
34 cells having monoallelic expression and 9 cells having biallelic expression for *XIST* were  
35 chosen for X-linked gene expression analysis. 17 *XIST* negative cells were selected based on  
36 *XIST* RPKM<1 and having RPKM sum >500; RPKM mean > 0.4. X-linked genes for  
37 expression analysis were chosen based on the  $5 < \mu_{\text{RPKM}} < 200$ .

38 **Ploidy:** To analyze the X-chromosomal ploidy, we considered 70 genes having RPKM mean  
39  $\geq 3$  distributed across the X-chromosome for 58 cells (28 early naive cells + 30 late naive cells).  
40 We calculated gene expression ratio through dividing the individual gene's RPKM by its  
41 median value across all the 58 cells. To visualize the profile of X-chromosome in all these  
42 cells, the normalised gene expression values (gene expression ratio) were used to build a  
43 moving average plot (neighbourhood size, k=9) using methods described by Mayshar *et al.*  
44 (Mayshar *et al.*, 2010).

45 **X-chromosome to autosomes expression ratio:** We calculated X:A ratio by dividing the  
46 median expression (RPKM) of the X-linked genes by the median expression (RPKM) of  
47 autosomal genes. For this analysis we removed the no/low expressed genes and considered the  
48 genes having  $\geq 0.5$  RPKM for both X and autosomal genes. We decided this threshold, based  
49 on the previous reports showing that exclusion of low expressed genes below 0.5 FPKM are  
50 more appropriate for assaying the active-X chromosome upregulation (Deng *et al.*, 2011; Li *et*  
51 *al.*, 2017; Sangrithi *et al.*, 2017; Yildirim *et al.*, 2012). We also profiled the expression level  
52 distribution of X-linked and autosomal genes as density plots created in R using the ggplot2  
53 package. However, for analysis of X:A ratio of UCLA1 primed, early naïve and late naïve cells,  
54 we considered the expressed genes with RPKM  $\geq 1$  and upper RPKM threshold that  
55 corresponded to the lowest 99th centile RPKM value of expression to avoid the difference  
56 between X-linked and autosomal gene expression distribution. We excluded escapees and  
57 genes in the pseudo autosomal regions of X-chromosome for our analysis.

58 **Statistical tests and Box-plots:** All statistical tests and boxplots were performed using R  
59 version 3.5.1(R Development Core Team, 2016).

60

## 61 **Supplemental References:**

62 Anders, S., Pyl, P.T., and Huber, W. (2015). HTSeq-A Python framework to work with high-  
63 throughput sequencing data. *Bioinformatics* 31, 166–169.

64 Chan, Y.S., Göke, J., Ng, J.H., Lu, X., Gonzales, K.A.U., Tan, C.P., Tng, W.Q., Hong, Z.Z.,  
65 Lim, Y.S., and Ng, H.H. (2013). Induction of a human pluripotent state with distinct  
66 regulatory circuitry that resembles preimplantation epiblast. *Cell Stem Cell* *13*, 663–675.

67 Chu, L.F., Leng, N., Zhang, J., Hou, Z., Mamott, D., Vereide, D.T., Choi, J., Kendzioriski, C.,  
68 Stewart, R., and Thomson, J.A. (2016). Single-cell RNA-seq reveals novel regulators of  
69 human embryonic stem cell differentiation to definitive endoderm. *Genome Biol.* *17*.

70 Deng, X., Hiatt, J.B., Nguyen, D.K., Ercan, S., Sturgill, D., Hillier, L.W., Schlesinger, F.,  
71 Davis, C.A., Reinke, V.J., Gingeras, T.R., et al. (2011). Evidence for compensatory  
72 upregulation of expressed X-linked genes in mammals, *Caenorhabditis elegans* and  
73 *Drosophila melanogaster*. *Nat. Genet.* *43*, 1179–1185.

74 Dobin, A., Davis, C.A., Schlesinger, F., Drenkow, J., Zaleski, C., Jha, S., Batut, P., Chaisson,  
75 M., and Gingeras, T.R. (2013). STAR: Ultrafast universal RNA-seq aligner. *Bioinformatics*  
76 *29*, 15–21.

77 Guo, G., Von Meyenn, F., Santos, F., Chen, Y., Reik, W., Bertone, P., Smith, A., and  
78 Nichols, J. (2016). Naive Pluripotent Stem Cells Derived Directly from Isolated Cells of the  
79 Human Inner Cell Mass. *Stem Cell Reports* *6*, 437–446.

80 Guo, G., von Meyenn, F., Rostovskaya, M., Clarke, J., Dietmann, S., Baker, D., Sahakyan,  
81 A., Myers, S., Bertone, P., Reik, W., et al. (2017). Epigenetic resetting of human  
82 pluripotency. *Dev.* *144*, 2748–2763.

83 Irie, N., Weinberger, L., Tang, W.W.C., Kobayashi, T., Viukov, S., Manor, Y.S., Dietmann,  
84 S., Hanna, J.H., and Surani, M.A. (2015). SOX17 is a critical specifier of human primordial  
85 germ cell fate. *Cell* *160*, 253–268.

86 Li, H., Handsaker, B., Wysoker, A., Fennell, T., Ruan, J., Homer, N., Marth, G., Abecasis,  
87 G., and Durbin, R. (2009). The Sequence Alignment/Map format and SAMtools.  
88 *Bioinformatics* *25*, 2078–2079.

89 Li, X., Hu, Z., Yu, X., Zhang, C., Ma, B., He, L., Wei, C., and Wu, J. (2017). Dosage  
90 compensation in the process of inactivation/reactivation during both germ cell development  
91 and early embryogenesis in mouse. *Sci. Rep.* *7*.

92 Liu, Q., Jiang, C., Xu, J., Zhao, M.T., Van Bortle, K., Cheng, X., Wang, G., Chang, H.Y.,  
93 Wu, J.C., and Snyder, M.P. (2017). Genome-Wide Temporal Profiling of Transcriptome and

94 Open Chromatin of Early Cardiomyocyte Differentiation Derived from hiPSCs and hESCs.  
95 *Circ. Res.* *121*, 376–391.

96 Mayshar, Y., Ben-David, U., Lavon, N., Biancotti, J.C., Yakir, B., Clark, A.T., Plath, K.,  
97 Lowry, W.E., and Benvenisty, N. (2010). Identification and classification of chromosomal  
98 aberrations in human induced pluripotent stem cells. *Cell Stem Cell* *7*, 521–531.

99 Patel, S., Bonora, G., Sahakyan, A., Kim, R., Chronis, C., Langerman, J., Fitz-Gibbon, S.,  
100 Rubbi, L., Skelton, R.J.P., Ardehali, R., et al. (2017). Human Embryonic Stem Cells Do Not  
101 Change Their X Inactivation Status during Differentiation. *Cell Rep.* *18*, 54–67.

102 R Development Core Team (2016). R: A language and environment for statistical computing.  
103 *R Found. Stat. Comput.*

104 Ramsköld, D., Wang, E.T., Burge, C.B., and Sandberg, R. (2009). An abundance of  
105 ubiquitously expressed genes revealed by tissue transcriptome sequence data. *PLoS Comput.*  
106 *Biol.* *5*, e1000598.

107 Sangrithi, M.N., Royo, H., Mahadevaiah, S.K., Ojarikre, O., Bhaw, L., Sesay, A., Peters,  
108 A.H.F.M., Stadler, M., and Turner, J.M.A. (2017). Non-Canonical and Sexually Dimorphic X  
109 Dosage Compensation States in the Mouse and Human Germline. *Dev. Cell* *40*, 289–301.e3.

110 Sperber, H., Mathieu, J., Wang, Y., Ferreccio, A., Hesson, J., Xu, Z., Fischer, K.A., Devi, A.,  
111 Detraux, D., Gu, H., et al. (2015). The metabolome regulates the epigenetic landscape during  
112 naive-to-primed human embryonic stem cell transition. *Nat. Cell Biol.* *17*, 1523–1535.

113 Sun, C., Zhang, J., Zheng, D., Wang, J., Yang, H., and Zhang, X. (2018). Transcriptome  
114 variations among human embryonic stem cell lines are associated with their differentiation  
115 propensity. *PLoS One* *13*.

116 Theunissen, T.W., Friedli, M., He, Y., Planet, E., O’Neil, R.C., Markoulaki, S., Pontis, J.,  
117 Wang, H., Iouranova, A., Imbeault, M., et al. (2016). Molecular Criteria for Defining the  
118 Naive Human Pluripotent State. *Cell Stem Cell* *19*, 502–515.

119 Yan, L., Yang, M., Guo, H., Yang, L., Wu, J., Li, R., Liu, P., Lian, Y., Zheng, X., Yan, J., et  
120 al. (2013). Single-cell RNA-Seq profiling of human preimplantation embryos and embryonic  
121 stem cells. *Nat. Struct. Mol. Biol.* *20*, 1131–1139.

122 Yildirim, E., Sadreyev, R.I., Pinter, S.F., and Lee, J.T. (2012). X-chromosome

123 hyperactivation in mammals via nonlinear relationships between chromatin states and  
124 transcription. *Nat. Struct. Mol. Biol.* *19*, 56–62.

125

126

127

128
